# Supplementary material for: Difunctional chemosensor for Cu(ii) and Zn(ii) based on Schiff base modified anthryl derivative with aggregation-induced emission enhancement and piezochromic characteristics
Source: Royal Society of Chemistry journal article supplement (doi:10.1039/c4tc02616k), 2014-12-24
Supplement: c4tc02616k1.pdf [file c4tc02616k1.pdf]

Electronic Supporting Information (ESI) for

**Fluorescence sensor for Zn (II) based on Schiff base modified anthryl derivative with aggregation-induced emission enhancement and piezochromic characteristics**

Mingdi Yang<sup>a, b</sup>, Yan Zhang<sup>a</sup>, Weiju Zhu<sup>a</sup>, Huizhen Wang<sup>a</sup>, Jing Huang<sup>b</sup>, Longhuai Cheng<sup>a</sup>,  
Hongping Zhou<sup>a, \*</sup>, Jieying Wu<sup>a</sup>, Yupeng Tian<sup>a</sup>

*<sup>a</sup>Key Laboratory of Opto-Electronic Information Acquisition and Manipulation, Ministry of Education, College of Chemistry and Chemical Engineering, Anhui University, Hefei, 230601, P. R. China.*

*<sup>b</sup>School of Materials and Chemical Engineering, Anhui Jianzhu University, Hefei, 230601, P. R. China.*

*\*Corresponding author. Fax: +86-551-3861279; Tel: +86-551-3861279*

*E-mail address: [zhpzhp@263.net](mailto:zhpzhp@263.net).*

Contents

1. Spectroscopic properties of compounds **1-3**.
2. Selected dihedral angles and interaction patterns in the crystals of **1-3**.
3. UV-Vis absorption and fluorescence spectra of compounds **1-3** in six organic solvents.
4. PL spectra of compounds **1** and **3** in acetonitrile/methanol mixtures.
5. Response of compounds **1** and **3** to different metal ions in methanol/H<sub>2</sub>O mixtures.
6. Calculation method of detection limit.
7. Calculation method of association constant.
4. Influence of pH and anions on the fluorescence spectra of **2**.
5. Reversibility and reversible cycles of **2**-Cu<sup>2+</sup>.
6. Competition experiments of **2**-Zn<sup>2+</sup>.
7. Influence of anions on the fluorescence spectra of **2**-Zn<sup>2+</sup>.
8. NMR and mass spectra for compounds **b, c** and **1-3**.
9. References.

**Table S1.** Spectroscopic properties of compounds **1–3**.

|          | <b>solvents</b> | $\lambda_{\max}^a$ | $\epsilon_{\max}^b$ | $\lambda_{\max}^c$ | $\Delta\nu^d$ |
|----------|-----------------|--------------------|---------------------|--------------------|---------------|
| <b>1</b> | Benzene         | 390                | 2.87                | 445                | 3155          |
|          | THF             | 390                | 3.07                | 440                | 3432          |
|          | Acetonitrile    | 387                | 3.16                | 436                | 3444          |
|          | DMF             | 391                | 3.06                | 441                | 3449          |
|          | Methanol        | 384                | 3.18                | 436                | 3220          |
|          | DMSO            | 390                | 2.36                | 445                | 3155          |
| <b>2</b> | Benzene         | 407                | 5.69                | 509                | 2031          |
|          | THF             | 406                | 6.06                | 516                | 1904          |
|          | Acetonitrile    | 407                | 6.29                | 521                | 1860          |
|          | DMF             | 409                | 5.76                | 525                | 1851          |
|          | Methanol        | 424                | 6.88                | 519                | 2316          |
|          | DMSO            | 415                | 5.57                | 528                | 1939          |
| <b>3</b> | Benzene         | 395                | 5.12                | 494                | 1971          |
|          | THF             | 398                | 6.56                | 510                | 1812          |
|          | Acetonitrile    | 396                | 5.32                | 524                | 1621          |
|          | DMF             | 399                | 4.96                | 530                | 1614          |
|          | Methanol        | 396                | 4.08                | 517                | 1692          |
|          | DMSO            | 402                | 5.04                | 533                | 1636          |

<sup>a</sup> Absorption peak position in nm ( $1 \times 10^{-5}$  mol L<sup>-1</sup>). <sup>b</sup> Maximum molar absorbance in  $10^4$  mol<sup>-1</sup> L cm<sup>-1</sup>. <sup>c</sup> Peak position of SPEF in nm ( $1 \times 10^{-5}$  mol L<sup>-1</sup>), excited at the absorption maximum. <sup>d</sup> Stokes shift in cm<sup>-1</sup>.

**Table S2.** Selected dihedral angles and interaction patterns in the crystals of **1–3**.

|          |                                | Dihedral angles (°) |              | Interactions | D (Å)        |
|----------|--------------------------------|---------------------|--------------|--------------|--------------|
|          |                                | Crystal state       | Gas phase    |              |              |
| <b>1</b> | P <sub>1</sub> -P <sub>2</sub> | <b>1.79</b>         | <b>11.53</b> | C-H... $\pi$ | <b>2.703</b> |
|          | P <sub>2</sub> -P <sub>3</sub> | <b>65.29</b>        | <b>52.93</b> | C-H... $\pi$ | <b>3.486</b> |
|          |                                |                     |              | N...O        | <b>2.609</b> |
| <b>2</b> | P <sub>1</sub> -P <sub>2</sub> | <b>35.58</b>        | <b>9.12</b>  | C-H... $\pi$ | <b>3.170</b> |
|          | P <sub>2</sub> -P <sub>3</sub> | <b>66.71</b>        | <b>48.17</b> | C-H...O      | <b>2.675</b> |
|          |                                |                     |              | N...O        | <b>2.584</b> |
| <b>3</b> | P <sub>1</sub> -P <sub>2</sub> | <b>44.83</b>        | <b>41.70</b> | C-H... $\pi$ | <b>2.977</b> |
|          | P <sub>2</sub> -P <sub>3</sub> | <b>79.63</b>        | <b>51.18</b> | C-H... $\pi$ | <b>2.974</b> |
|          |                                |                     |              | C-H... $\pi$ | <b>3.317</b> |

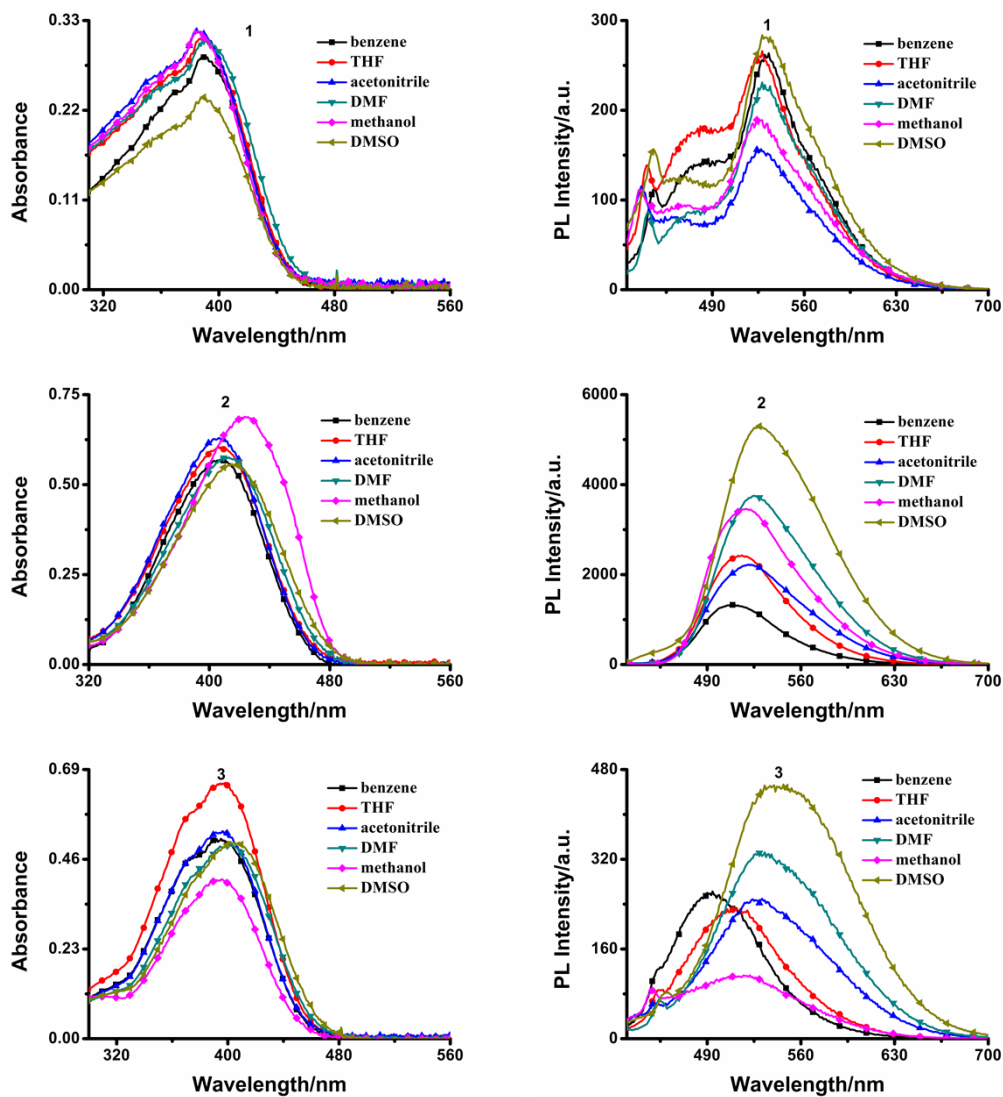

**Fig. S1.** One-photon absorption spectra and one-photon excitation fluorescence of compounds **1–3** in six organic solvents of different polarities with a concentration of  $1 \times 10^{-5} \text{ mol L}^{-1}$ .

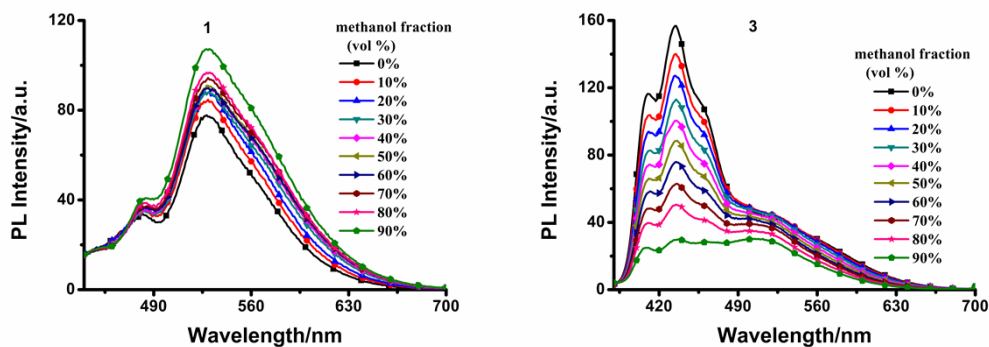

**Fig. S2.** PL spectra of compounds **1** and **3** in acetonitrile/methanol mixtures with different methanol fractions. The inset depicts the changes of PL peak intensity with different methanol fractions.

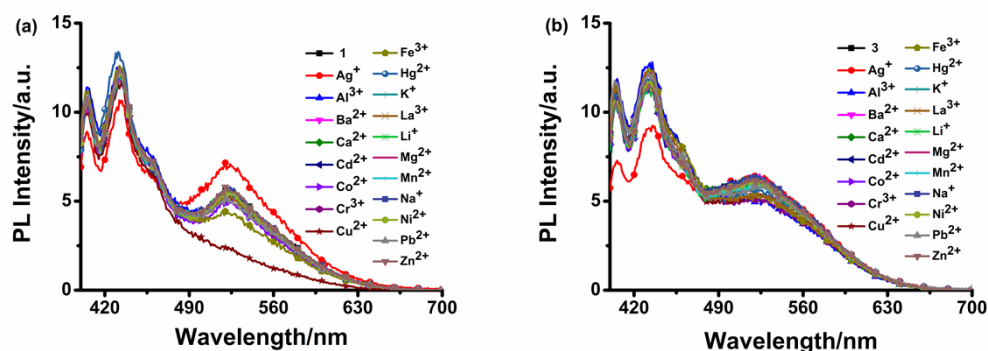

**Fig. S3** Fluorescent spectra of **1** (a) and **3** (b) (10  $\mu$ M) in methanol/H<sub>2</sub>O (4/1, v/v, pH 7.2) HEPES buffer solution with 1 equiv. different metal ions.

### Calculation method of detection limit<sup>1</sup>

The detection limit was calculated based on the UV-vis and fluorescence titration. To determine the S/N ratio, the absorbance or emission intensity of **2** without Cu<sup>2+</sup> was measured by eight times and the standard deviation of blank measurements was determined. To gain the slop, the absorbance data at 432 nm or the fluorescent intensity data at 519 nm was plotted as a concentration of Cu<sup>2+</sup>. So the detection limit was calculated with the follow equation:

$$\text{Detection limit} = 3\sigma/K$$

Where  $\sigma$  is the standard deviation of blank measurements, and K is the slop between the absorbance or fluorescence versus Cu<sup>2+</sup> concentration.

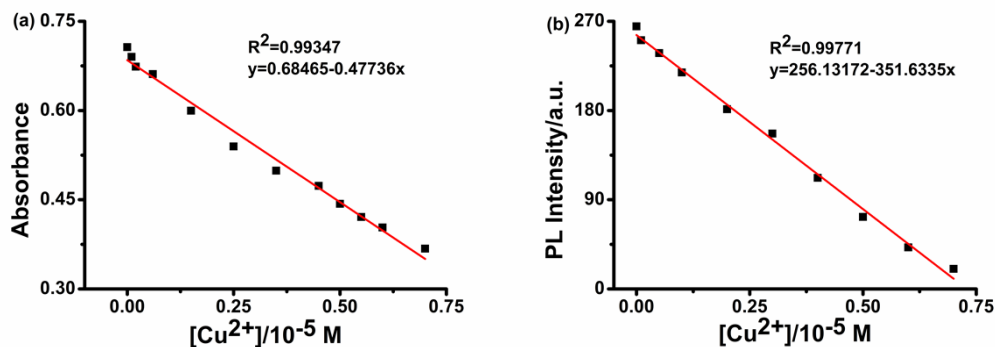

**Fig. S4** Normalized response of absorption (a) and fluorescence (b) signal of **2** in the presence of different concentration  $\text{Cu}^{2+}$ .

### Calculation method of association constant<sup>2</sup>

Assuming a 2:1 complex formation, the association constant was calculated on the basis of the titration curves of the sensor **2** with  $\text{Cu}^{2+}$ . Association constants were determined by a linear least square fitting of data with the following equation as a referenced method.

$$[\text{Cu}^{2+}] = 1/2K_a[2]_0 \cdot x / (1-x^2) + [2]_0/2 \cdot x$$

Where  $K_a$  is complex association constant;  $[\text{Cu}^{2+}]$  is the concentration of  $\text{Cu}^{2+}$ ;  $[2]_0$  is the initial concentration of sample;  $x = (A - A_0) / (A_{\min} - A_0)$ ;  $A$ ,  $A_0$  and  $A_{\min}$  is the absorption intensity at 432 nm, free ligand and the absorption intensity at 432 nm upon the addition of  $\text{Cu}^{2+}$ .

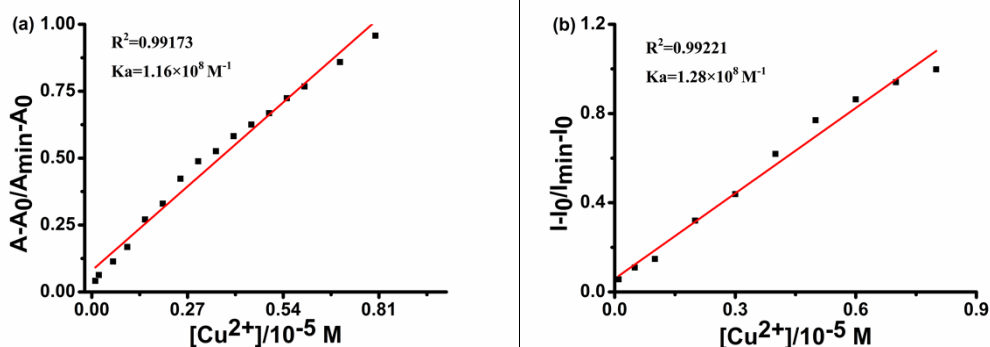

**Fig. S5** Absorbance and fluorescence intensity ratio ( $A-A_0/A_{\min}-A_0$  and  $I-I_0/I_{\min}-I_0$ ) as the square of  $\text{Cu}^{2+}$  concentration.

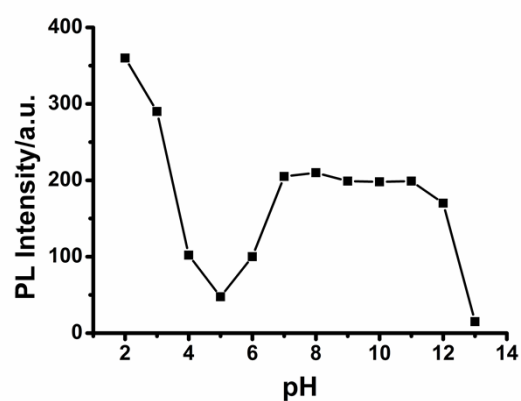

**Fig. S6** Influence of pH on the fluorescence spectra of **2** (fluorescence intensity at 519 nm).

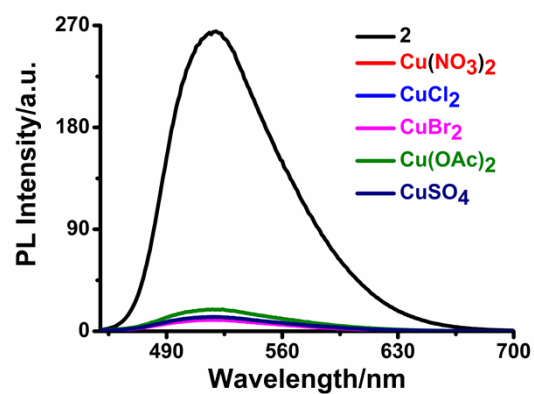

**Fig. S7** Fluorescence spectra of **2** with addition of  $\text{Cu}^{2+}$  with different counter anions in methanol/ $\text{H}_2\text{O}$  (4/1, v/v, pH 7.2) HEPES buffer solution.

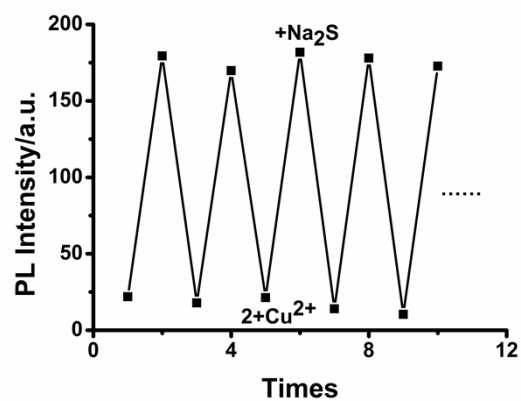

**Fig. S8** Sensor reversibility and reversible cycles of  $\text{2}+\text{Cu}^{2+}$ .

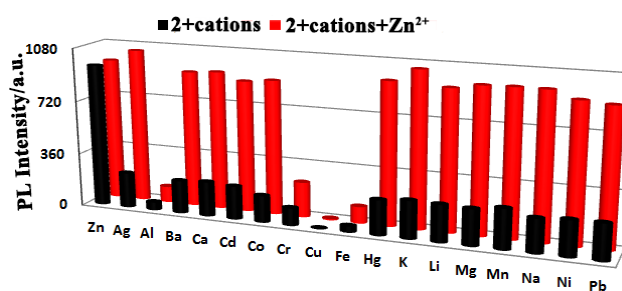

**Fig. S9** Fluorescence intensity change of **2** (10  $\mu$ M) upon addition of various metal ions (10  $\mu$ M) in and without the presence of Zn<sup>2+</sup> (10  $\mu$ M) in methanol solution.

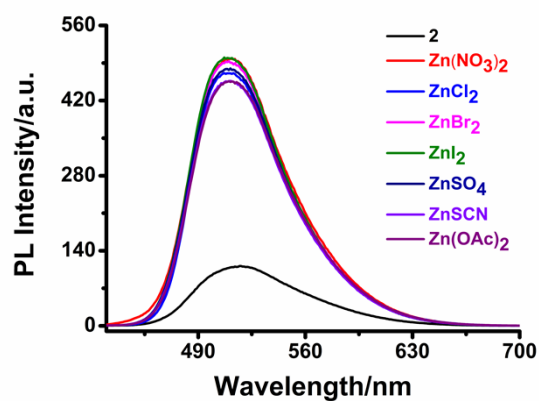

**Fig. S10** Fluorescence spectra of **2** with addition of Zn<sup>2+</sup> with different counter anions in methanol solution.

**Fig. S11.**  $^1\text{H}$  NMR spectrum of **b**.

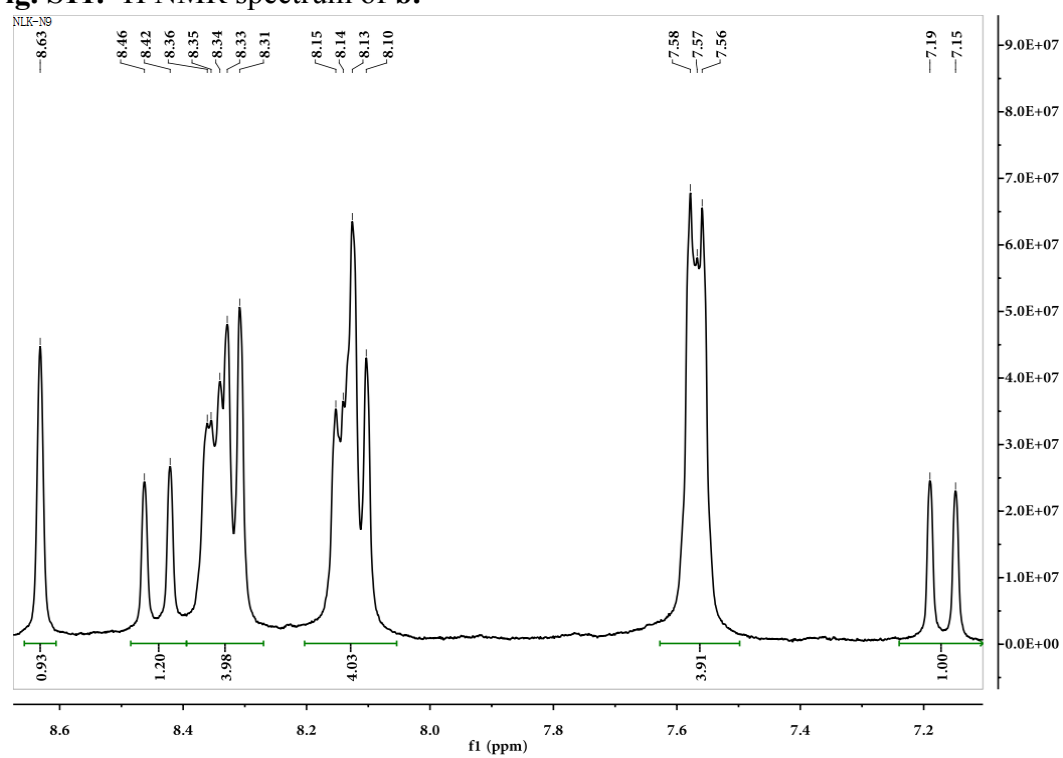

**Fig. S12.**  $^{13}\text{C}$  NMR spectrum of **b**.

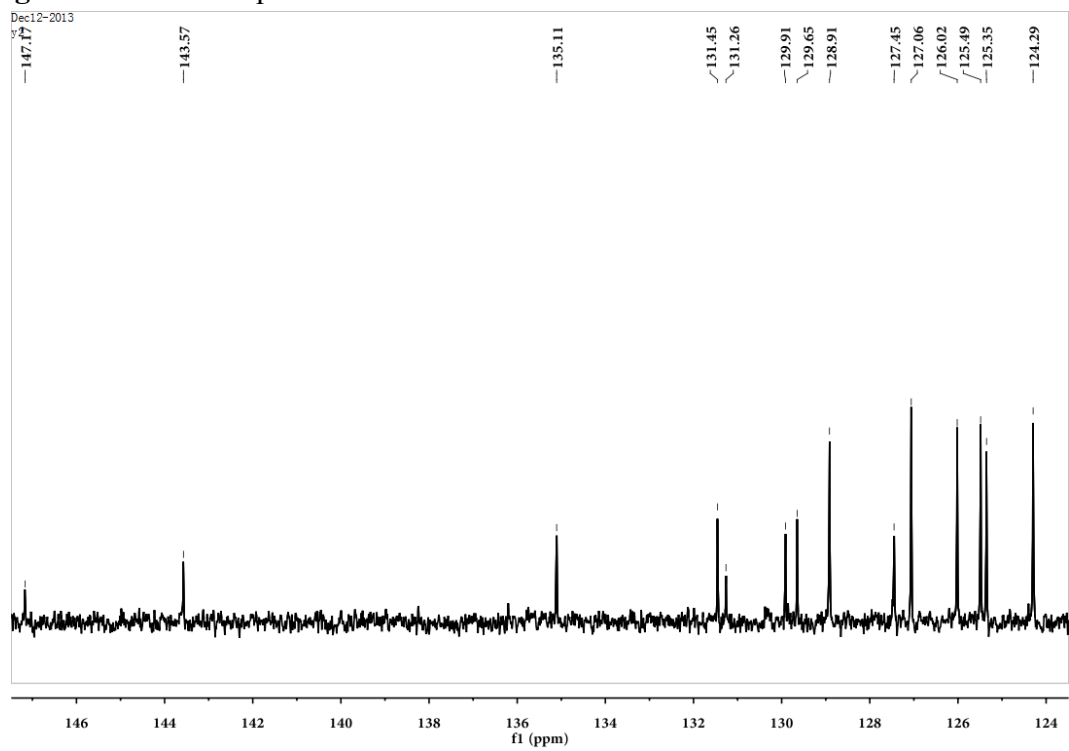



**Fig. S13.**  $^1\text{H}$  NMR spectrum of **c**.

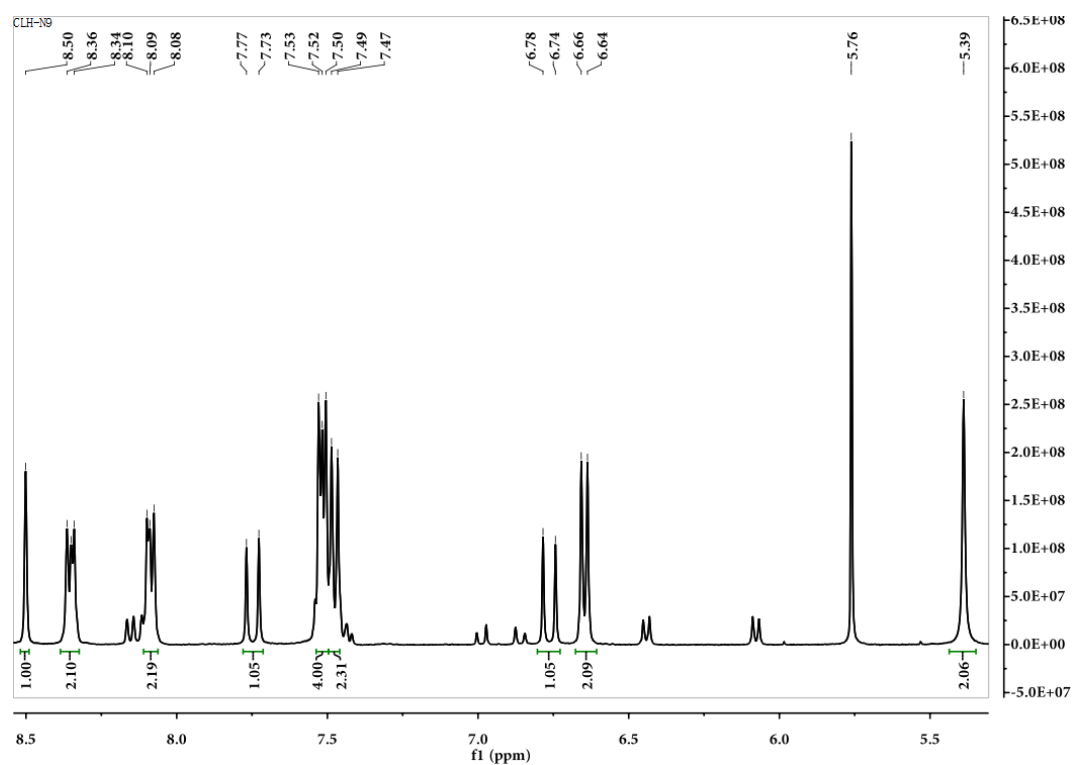

**Fig. S14.**  $^{13}\text{C}$  NMR spectrum of **c**.

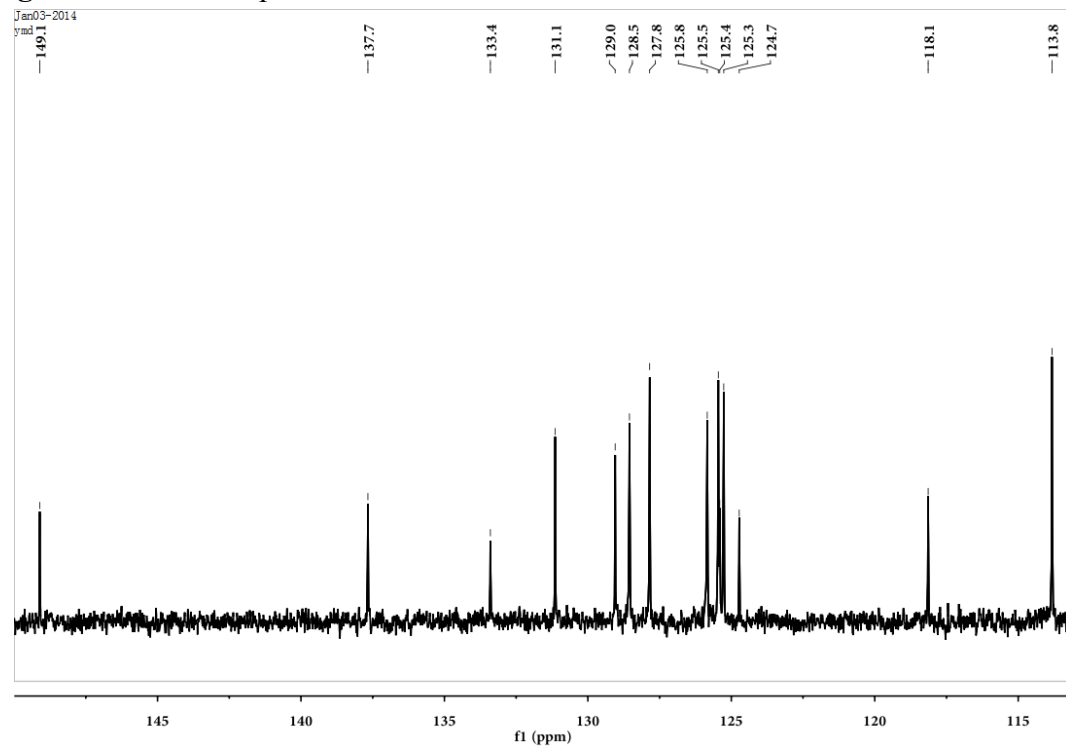

**Fig. S15.**  $^1\text{H}$  NMR spectrum of **1**.

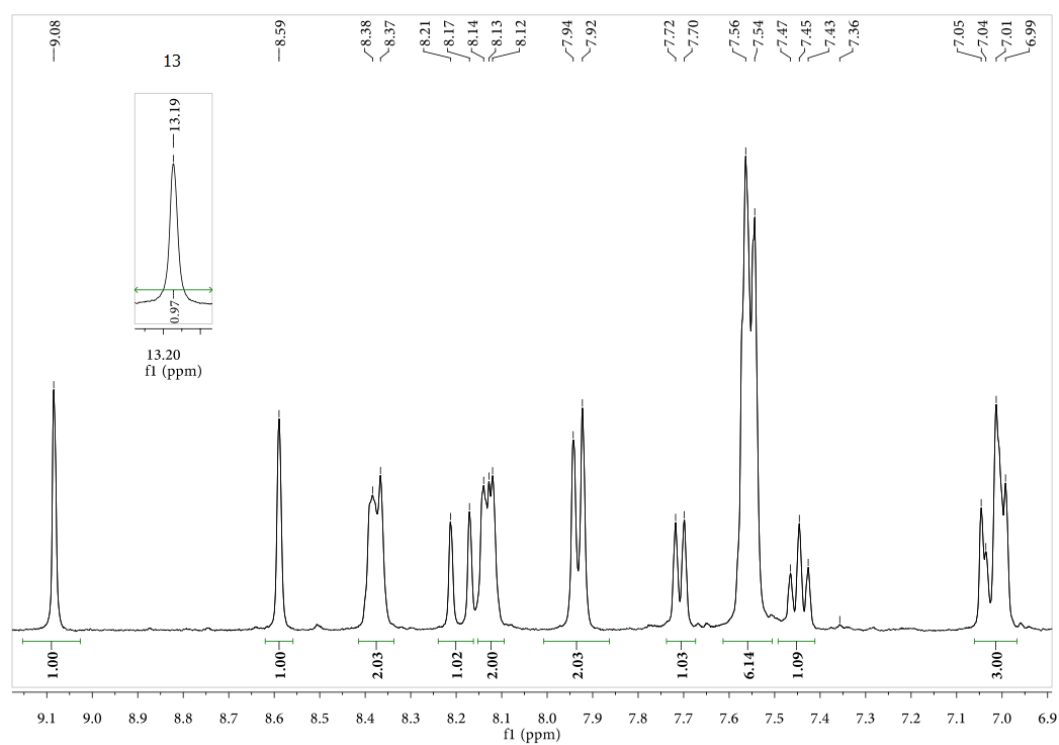

**Fig. S16.**  $^{13}\text{C}$  NMR spectrum of **1**.

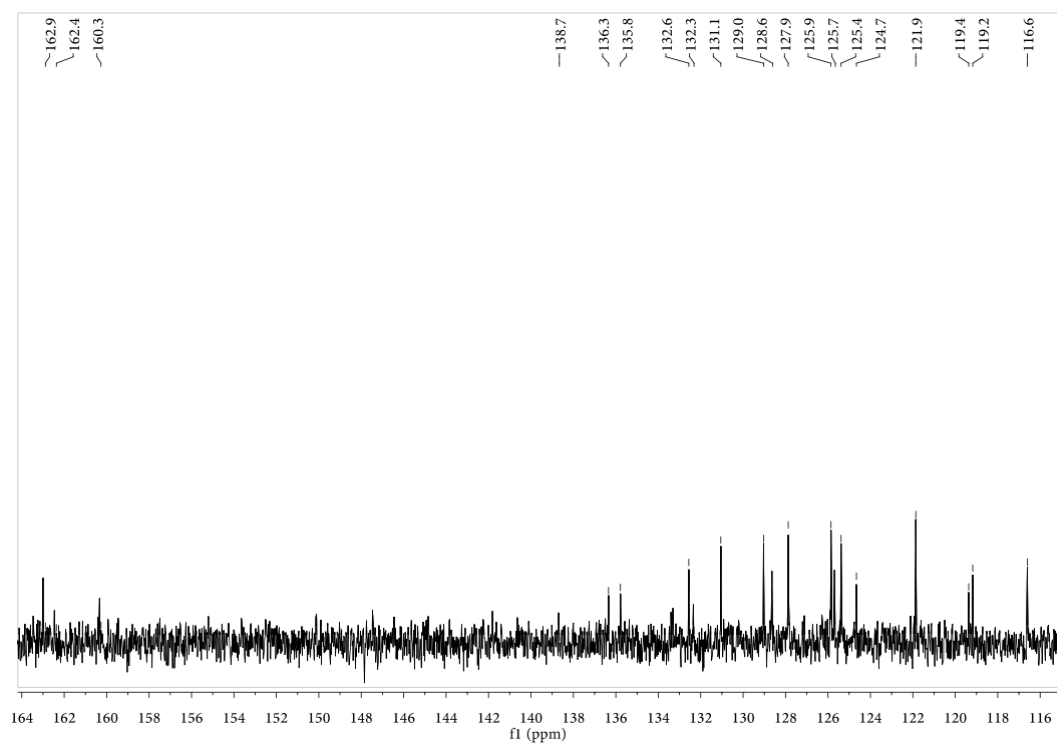

**Fig. S17.** MS spectrum of **1**.

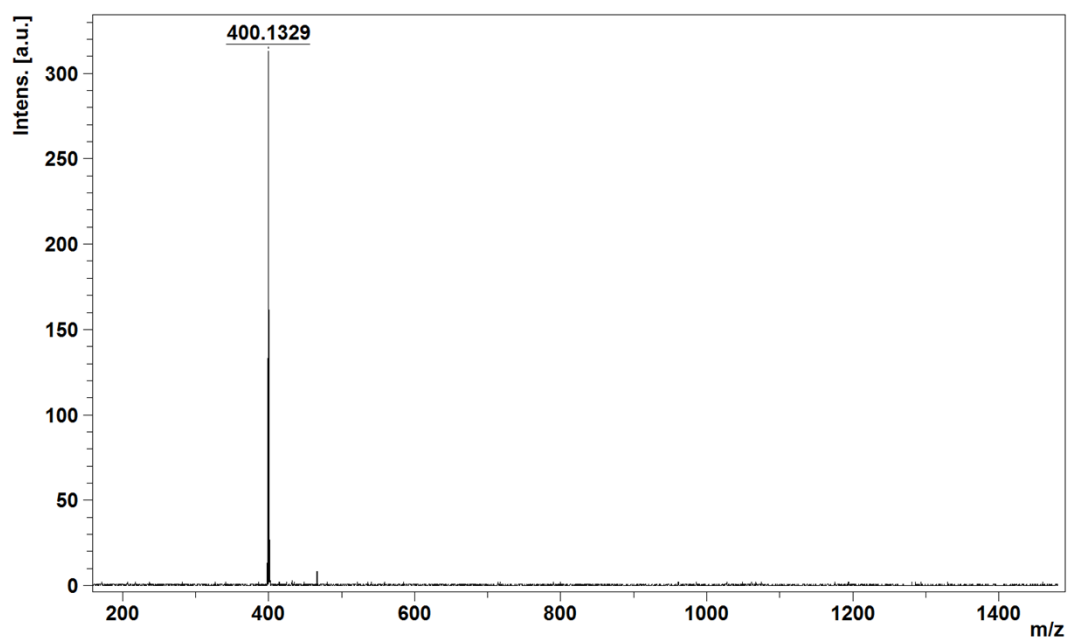

**Fig. S18.**  $^1\text{H}$  NMR spectrum of **2**.

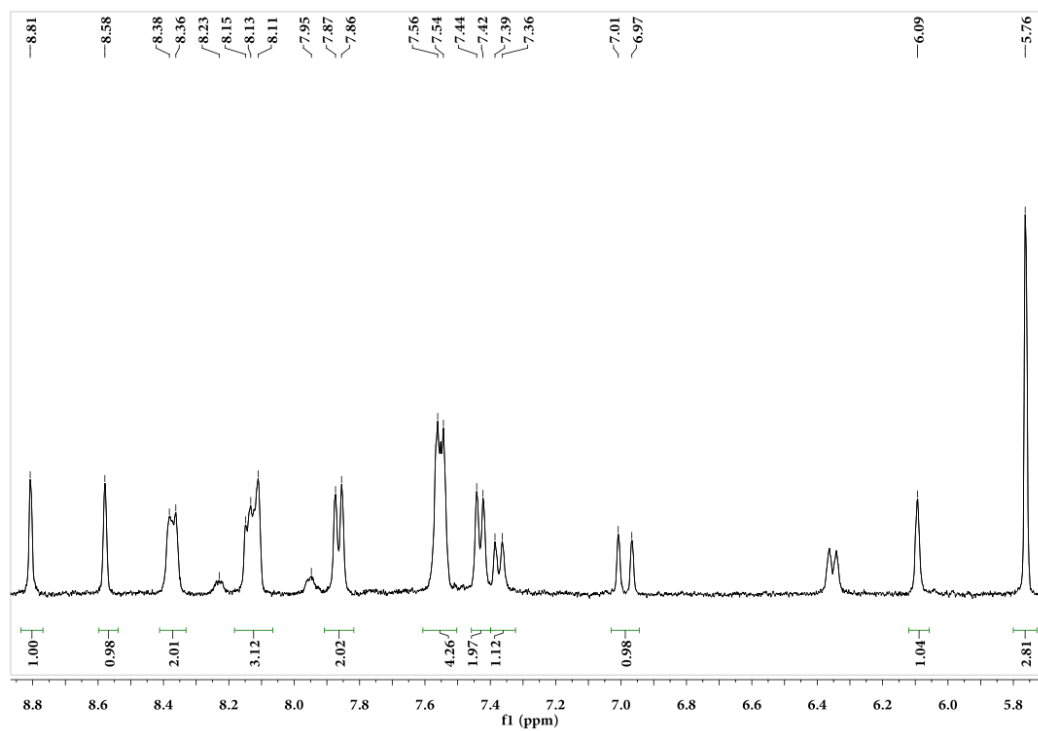

**Fig. S19.**  $^{13}\text{C}$  NMR spectrum of **2**.

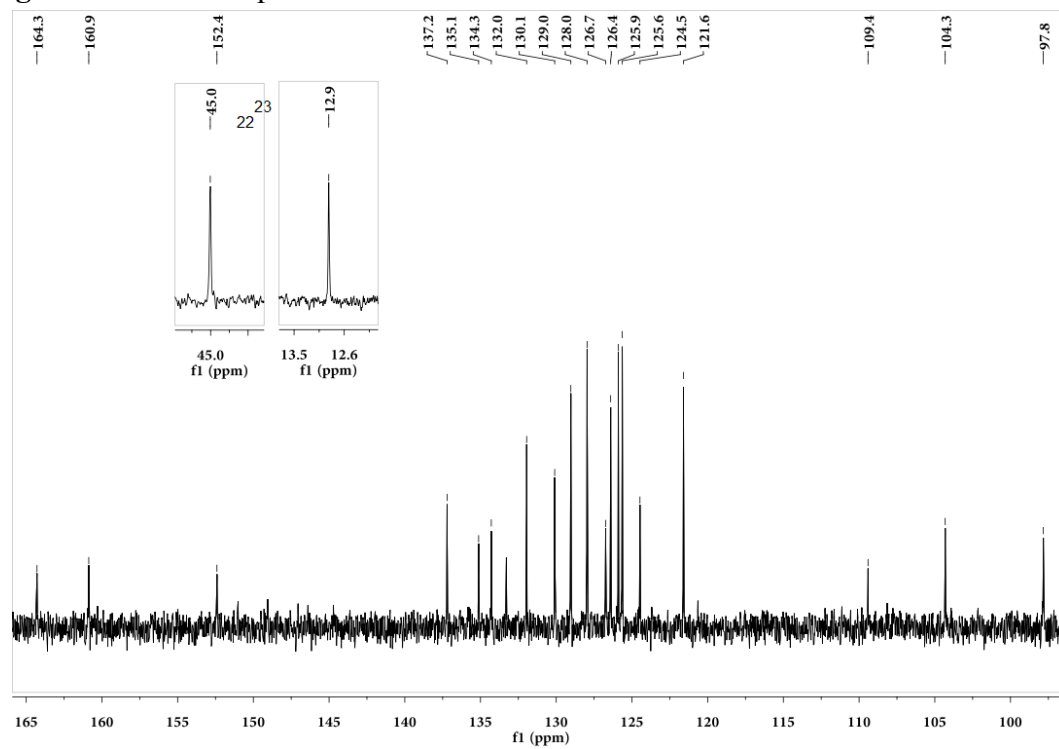

**Fig. S20.** MS spectrum of **2**.

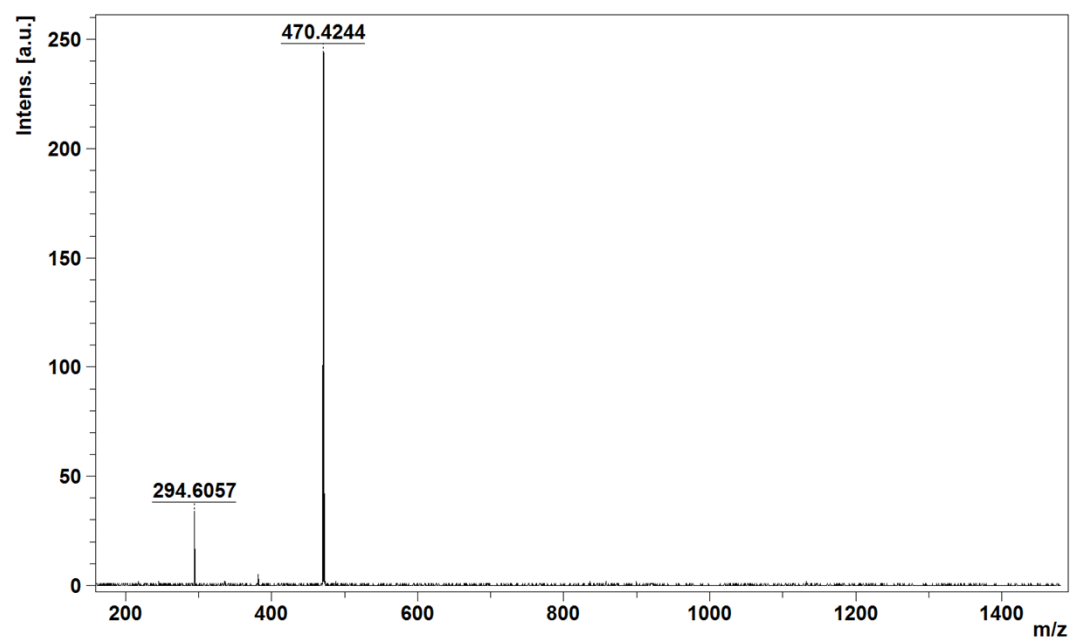

**Fig. S21.**  $^1\text{H}$  NMR spectrum of **3**.

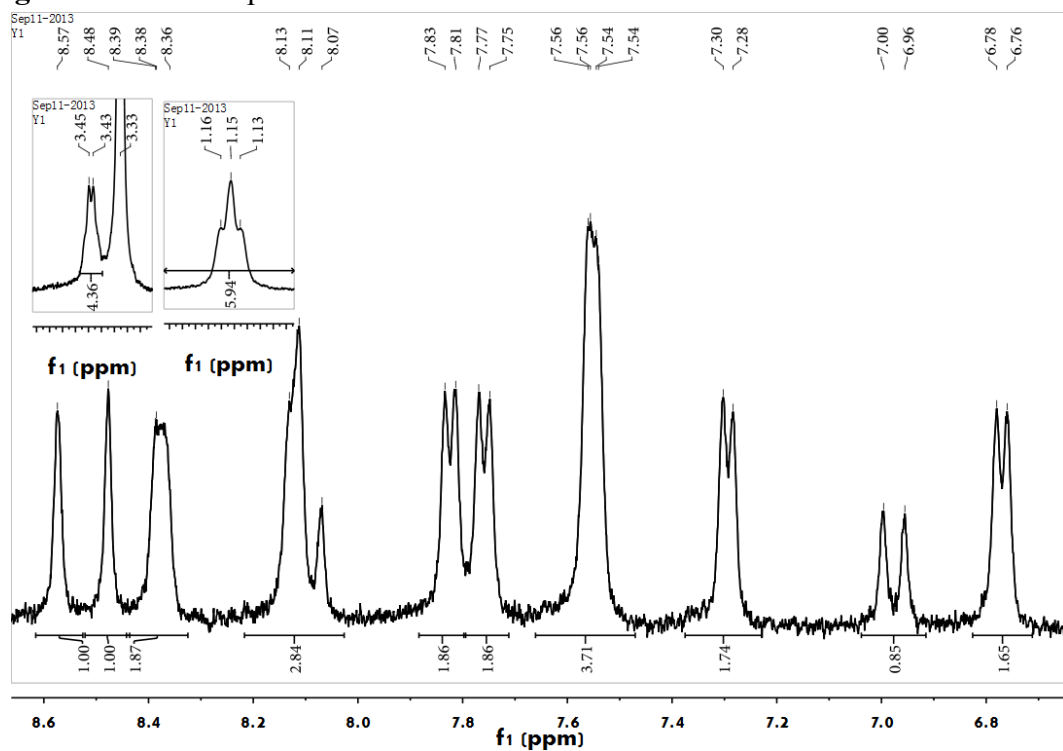

**Fig. S22.**  $^{13}\text{C}$  NMR spectrum of **3**.

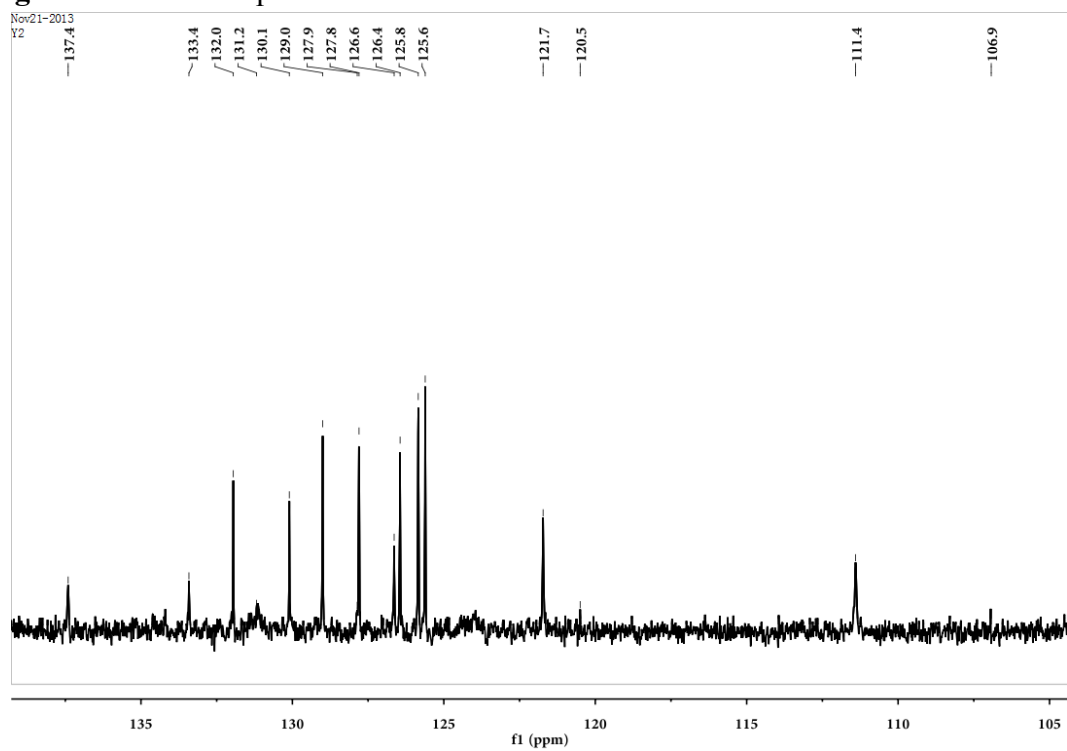

**Fig. S23.** MS spectrum of **3**.

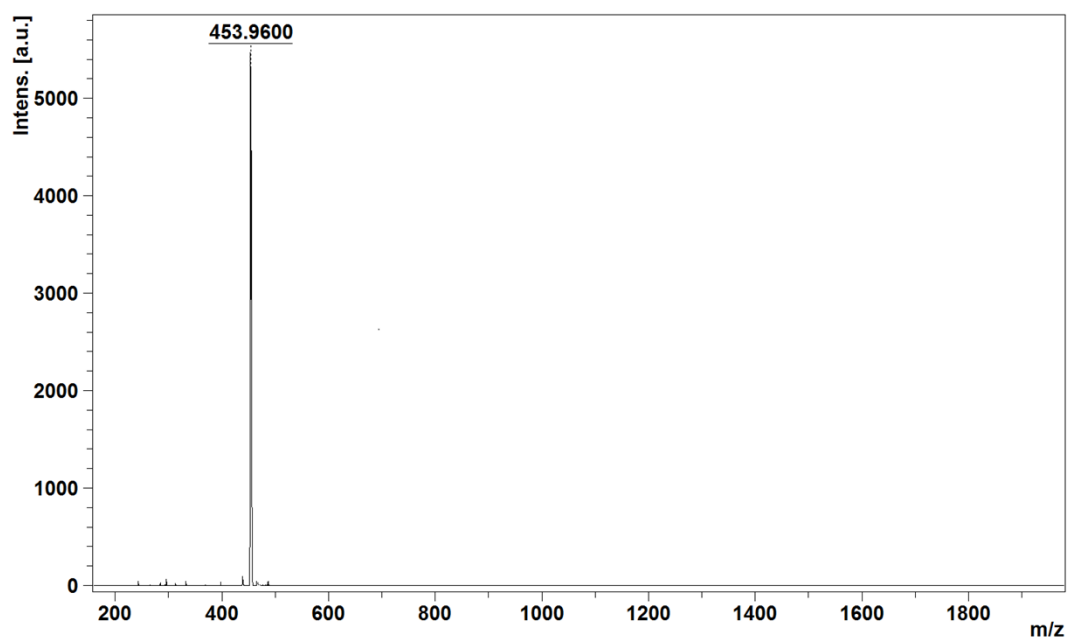

**Reference**

1. J. S. Wu, W. M. Liu, X. Q. Zhuang, P. F. Wang, *Org. Lett.* 2007, **9**, 33.
2. M. Shellaiah, Y. H. Wu, A. Singh, M. V. R. Raju, H. C. Lin, *J. Mater. Chem. A* 2013, **1**, 1310.
